# Supplementary material for: Unified pre- and postsynaptic long-term plasticity enables reliable and flexible learning
Source: eLife journal article supplement (doi:10.7554/elife.09457), 2015-08-26
Supplement: supp [file elife-09457-supp-v1.zip]

# Appendix 1

3rd August 2015

## Comparison with triplet model

Our model has some similarities with the triplet-STDP model introduced in [1], however note that the triplet model does not distinguish between pre- and postsynaptic components of expression. The triplet model is defined by the following components: presynaptic traces,  $x_1$  and  $x_2$ , and postsynaptic traces  $y_1$  and  $y_2$ . The weight changes are modelled as a combination of pair and triplet components (*full Triplet* model) as follows

$$\Delta w^- = -X(t)y_1 [A_2^- + A_3^- x_2(t - \epsilon)] \quad (1)$$

$$\Delta w^+ = Y(t)x_1 [A_2^+ + A_3^+ y_2(t - \epsilon)] \quad (2)$$

However, to fit the intra-pairing frequency observed in the young rat visual cortex (VC) [2], a reduced model ( $A_3^- = 0$  and  $A_2^+ = 0$ ) was found to be sufficient (*minimal VC Triplet*) [1]

$$\Delta w^- = -X(t)A_2^- y_1 \quad (3)$$

$$\Delta w^+ = Y(t)A_3^+ x_1 y_2(t - \epsilon) \quad (4)$$

Moreover, another slightly more complex model ( $A_3^- = 0$ ) was found to be able to capture triplet and quadruplet experiments performed in the hippocampus [3] (*minimal HC Triplet*)

$$\Delta w^- = -X(t)A_2^- y_1 \quad (5)$$

$$\Delta w^+ = Y(t)x_1 [A_2^+ + A_3^+ y_2(t - \epsilon)] \quad (6)$$

Interestingly, our model also has two LTP and one LTD components, that can be mapped onto the *minimal*

15 *HC Triplet* (see Table 1). However, to capture the pharmacological blockade experiments reported in [4], we  
 16 needed three triplets, rather than one triplet and two doublets as in the *minimal HC Triplet* model.

|                    | $LTD$        | $LTP_1$      | $LTP_2$        |
|--------------------|--------------|--------------|----------------|
| pre-post STDP      | $Xd_-y_-y_+$ | $Xd_+y_+x_+$ | $Yc_+x_+y_-$   |
| minimal HC Triplet | $XA_2^-y_1$  | $YA_2^+x_1$  | $YA_3^+x_1y_2$ |
| minimal VC Triplet | $XA_2^-y_1$  | -            | $YA_3^+x_1y_2$ |

Table 1: Comparison between unified pre- and postsynaptic STDP model and different versions of the *triplet* model (for simplicity we removed the function arguments) [1].

## References

- [1] Pfister, J.-P. & Gerstner, W. Triplets of spikes in a model of spike timing-dependent plasticity. *Journal of Neuroscience* **26**, 9673–9682 (2006).
- [2] Sjöström, P. J., Turrigiano, G. G. & Nelson, S. B. Rate, Timing, and Cooperativity Jointly Determine Cortical Synaptic Plasticity. *Neuron* **32**, 1149–1164 (2001).
- [3] Wang, H.-X., Gerkin, R. C., Nauen, D. W. & Bi, G.-Q. Coactivation and timing-dependent integration of synaptic potentiation and depression. *Nature Publishing Group* **8**, 187–193 (2005).
- [4] Sjöström, P. J., Turrigiano, G. G. & Nelson, S. Multiple forms of long-term plasticity at unitary neocortical layer 5 synapses. *Neuropharmacology* **52**, 176–184 (2007).
