# Supplementary figures and images for: Unified pre- and postsynaptic long-term plasticity enables reliable and flexible learning
Source: eLife journal article supplement (doi:10.7554/elife.09457), 2015-08-26

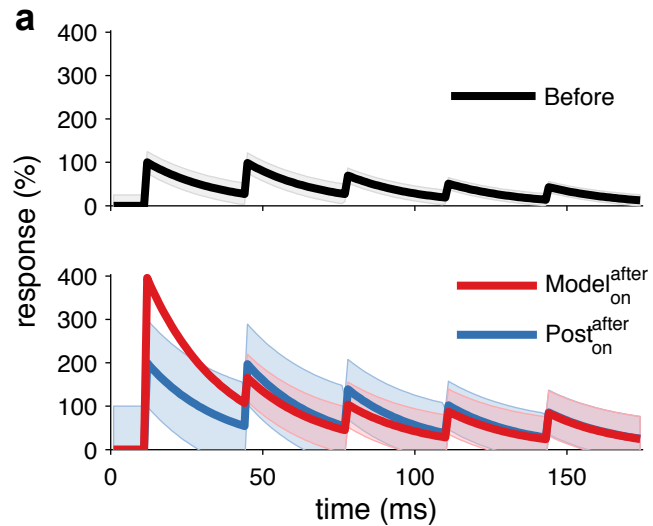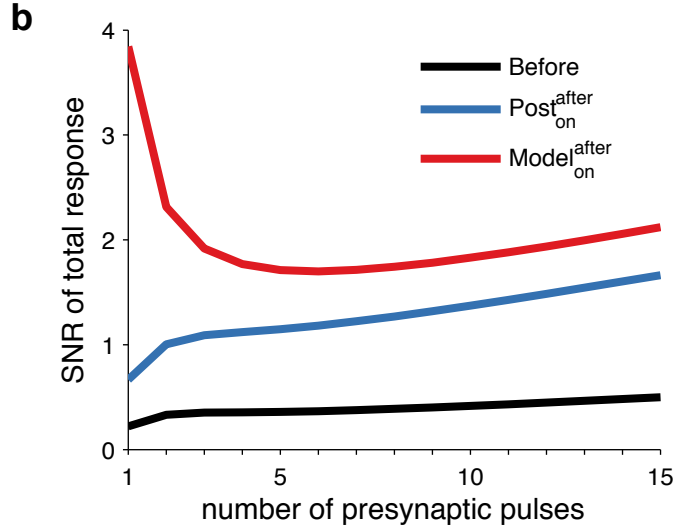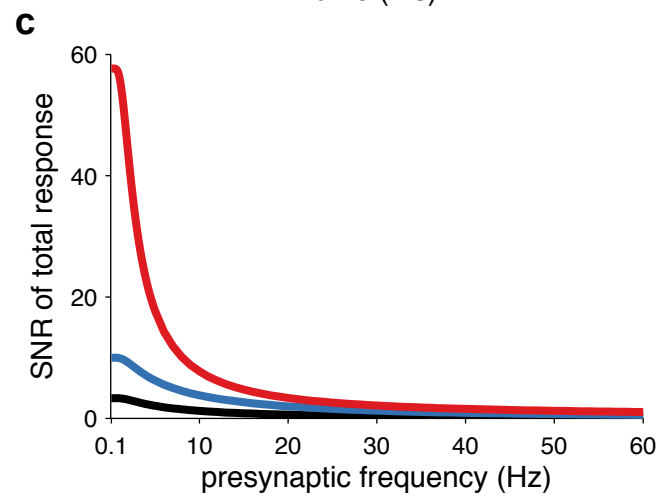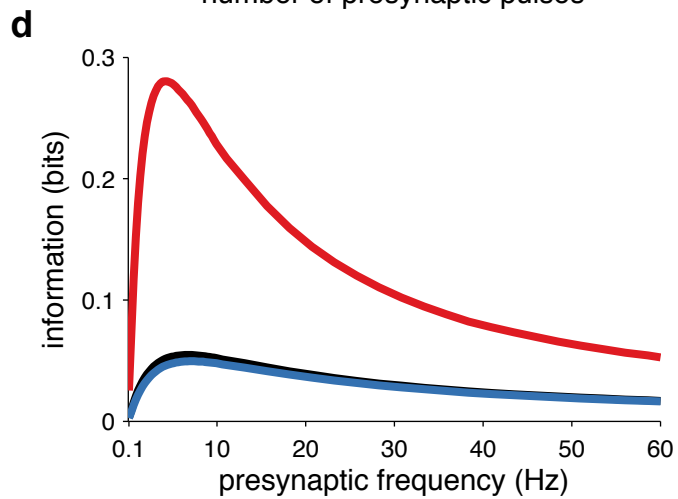

Supplement: supp [file elife-09457-supp-v1.zip]

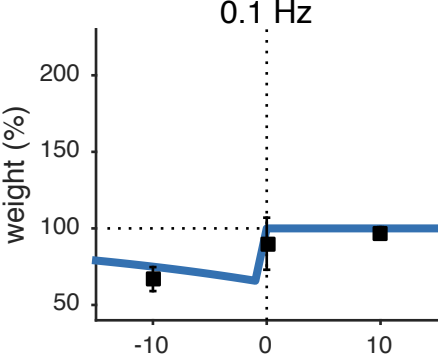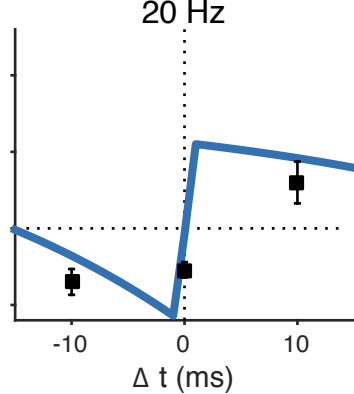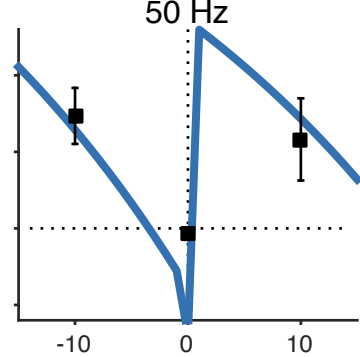

Supplement: supp [file elife-09457-supp-v1.zip]

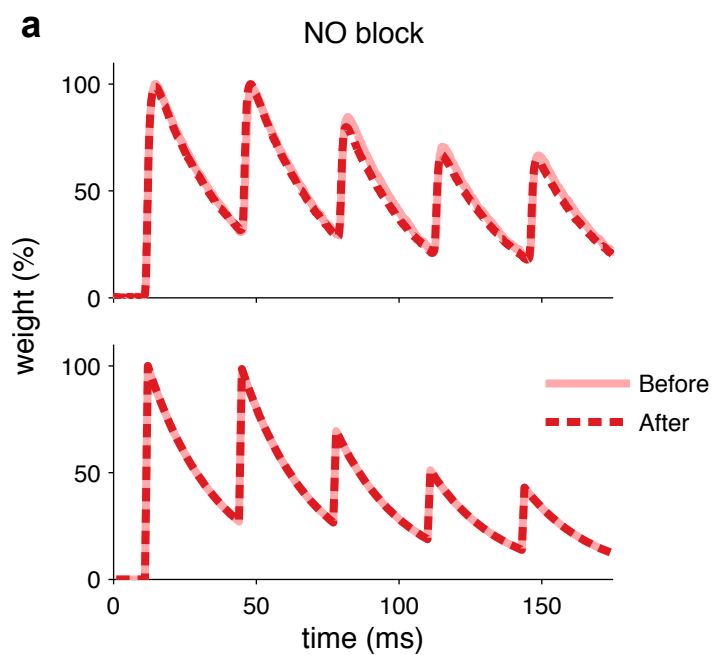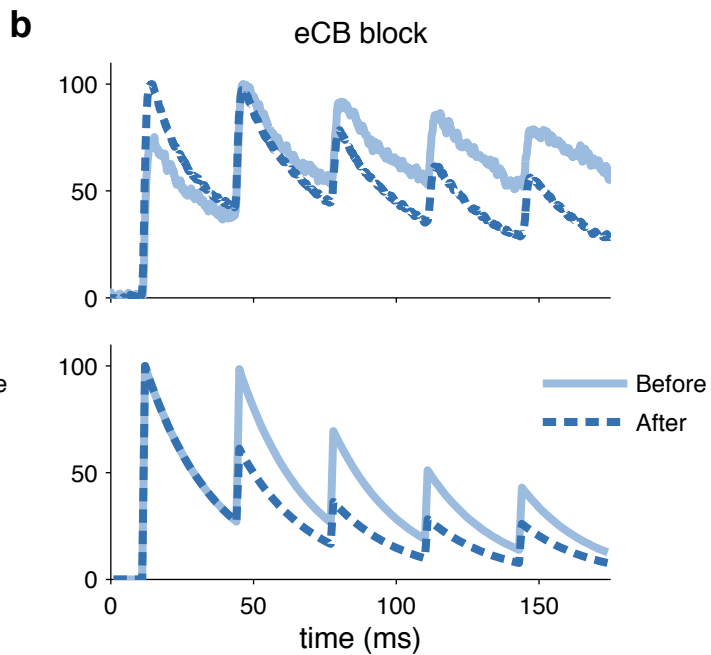

Supplement: supp [file elife-09457-supp-v1.zip]

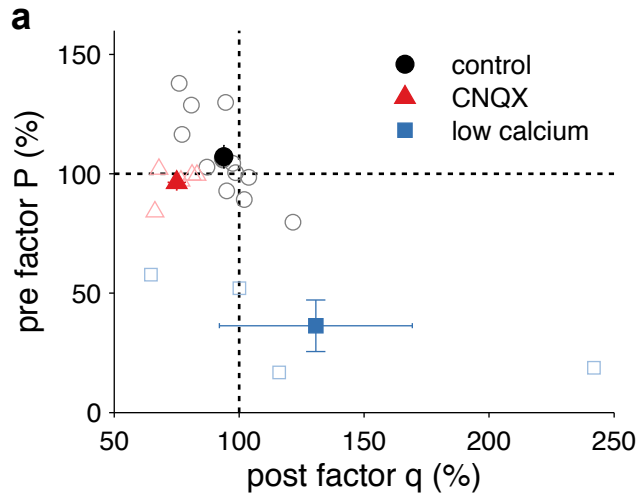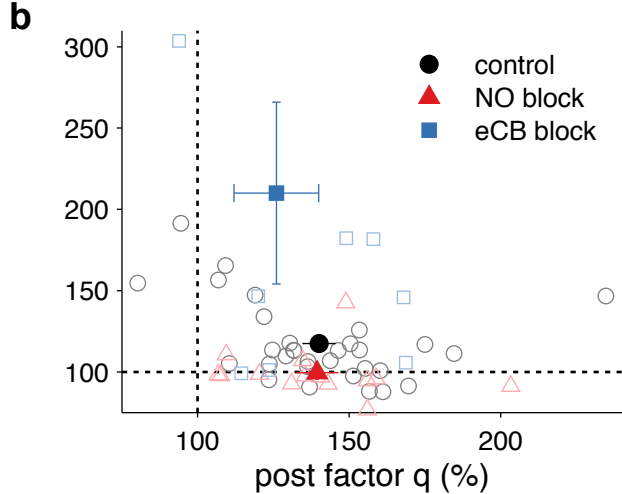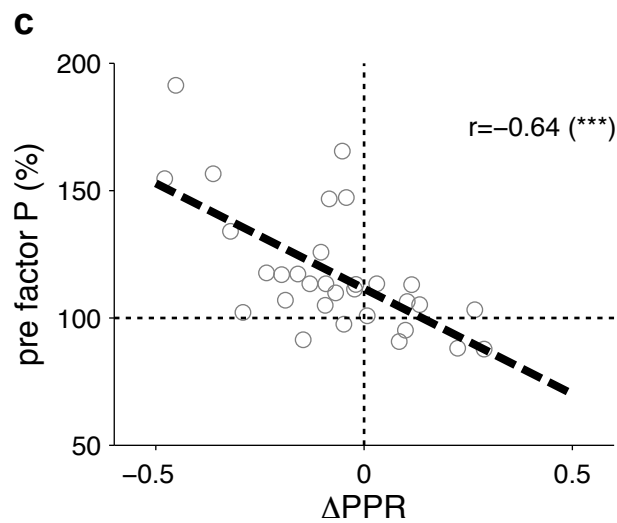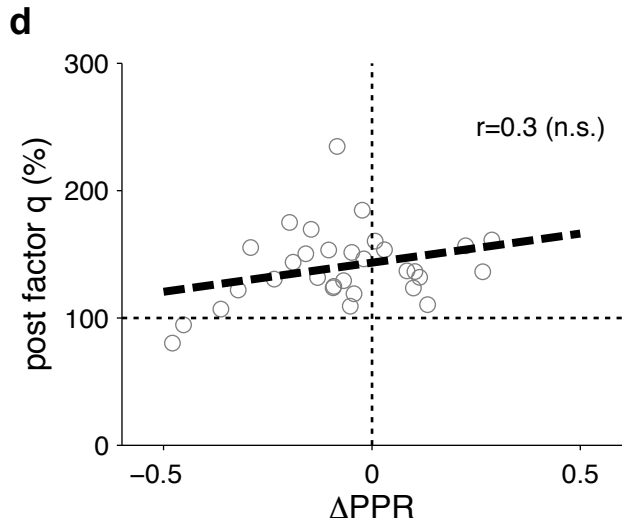

Supplement: supp [file elife-09457-supp-v1.zip]

**a**

synaptic variance

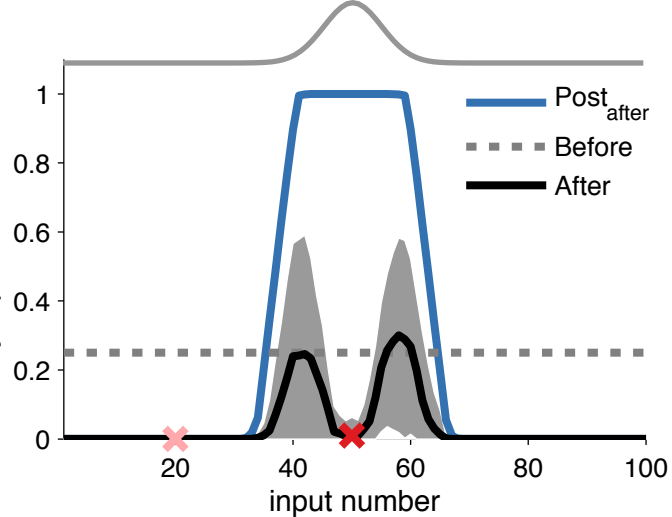**b**

pre factor P

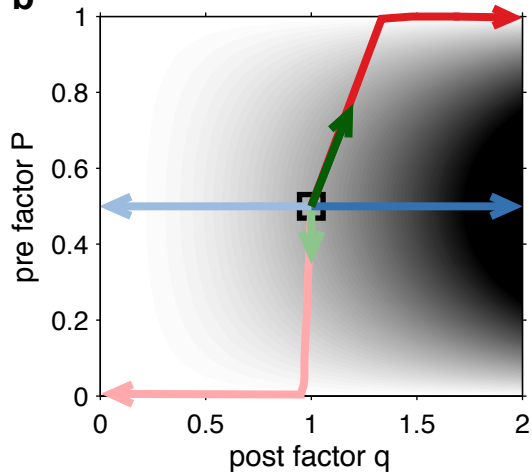**c** $p_{\text{discrimination}}$ 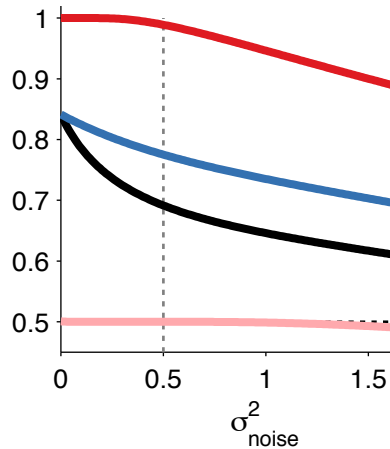

Supplement: supp [file elife-09457-supp-v1.zip]

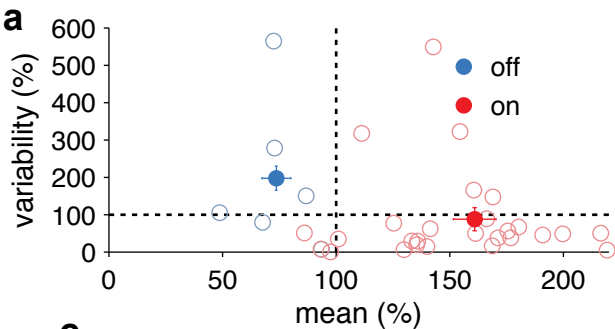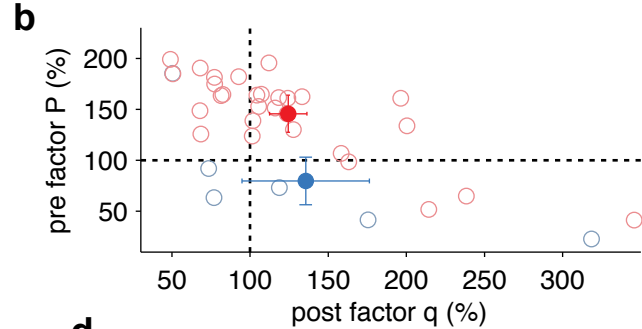

Supplement: supp [file elife-09457-supp-v1.zip]
